# Supplementary material
Source: PubMed Central journal article supplement (PMC8758497)
Supplement: 41380_2020_856_MOESM5_ESM.pdf [file 41380_2020_856_MOESM5_ESM.pdf]

## Presenilin 1 phosphorylation regulates amyloid- $\beta$ degradation by microglia

Jose Henrique Ledo<sup>1#</sup>, Thomas Liebmann<sup>1</sup>, Ran Zhang<sup>2</sup>, Jerry C. Chang<sup>1</sup>, Estefania P. Azevedo<sup>3</sup>, Eitan Wong<sup>4</sup>, Hernandez M. Silva<sup>5</sup>, Olga G Troyanskaya<sup>3,6</sup>, Victor Bustos<sup>1</sup>, Paul Greengard<sup>1†</sup>.

<sup>1</sup> Laboratory of Molecular and Cellular Neuroscience, The Rockefeller University, New York, New York, 10065, USA.

<sup>2</sup> Lewis Sigler Institute for Integrative Genomics, Princeton University, Princeton, New Jersey, 08544, USA.

<sup>3</sup> Laboratory of Molecular Genetics, The Rockefeller University, New York, New York, 10065, USA.

<sup>4</sup> Chemical Biology Program, Memorial Sloan Kettering Cancer Center, New York, New York, 10065, USA.

<sup>5</sup> Skirball Institute of Biomolecular Medicine, New York University School of Medicine, New York, New York, 10016, USA.

<sup>6</sup> Flatiron Institute, Simons Foundation, New York, New York, 10010, USA.

† In Memoriam

# Correspondence should be addressed to: Jose H. Ledo – [jledo@rockefeller.edu](mailto:jledo@rockefeller.edu)

## Supplemental Figures Legends

### **Supplementary Figure 1: Lack of phosphorylation at serine 367 in PS1<sup>KI/KI</sup> microglia. Number of microglial in *Psen1*<sup>KI/KI</sup> mouse. FACS/Sorting gating strategy for isolating microglia from mouse brain.**

(A) Total levels of PS1 in microglial cells from WT or *Psen1*<sup>KI/KI</sup> mice was analyzed by Western blot. GAPDH was used as loading control. (B) Phosphorylation of PS1 at serine 367 in microglial cells from WT or *Psen1*<sup>KI/KI</sup> mice was analyzed by Western blot using pS367-PS1 antibody. Total PS1 was immunoprecipitated from microglia lysates using an anti-PS1 antibody covalently bound to agarose beads, and immunoblotted with anti-PS1 pS367, stripped and reblotted against total PS1. (C) Schematic diagram showing the strategy used to verify microglial branching in Figure 1. Each segment is represented in different color (1-4), terminal endings are represented as number 4. (D) Confocal stack of microglia in the 2-month-old WT or *Psen1*<sup>KI/KI</sup> mouse brain. Scale bar represents 50  $\mu\text{m}$ . Quantification of microglial density (cells /  $10^{-3}$   $\text{mm}^3$ ), data represent means  $\pm$  SEM ( $n = 5$  mice per group). (E) Microglial cells were harvested from WT or *Psen1*<sup>KI/KI</sup> mice and gated for CD45<sup>+</sup>, CD11B<sup>+</sup>, CX3CR1<sup>+</sup>, CSF1R<sup>+</sup>, C-KIT<sup>-</sup>, LY-6C<sup>-</sup>. N = 3-4 individual brains per group. (E) Quantitative RT-PCR performed for *Psen1* (left panel) and *Atp6v0a1* (middle panel) in control or *Psen1*<sup>KO</sup> primary microglia culture (E) Lysosomal pH of control or *Psen1*<sup>KO</sup> primary microglia culture was determined using LysoSensor Yellow/Blue dextran (450/535 nm) (right panel). Data represent means  $\pm$  SEM ( $n = 5$  independent cell culture preparations; \*\*\*\* $P < 0.0001$ , Student's t-test).

### **Supplementary Figure 2: A $\beta$ levels, $\gamma$ -secretase activity and gliosis in 5xFAD and 5xFAD\* *Psen1*<sup>KI/KI</sup> mice.**

(A) The levels of soluble A $\beta$ 40 or A $\beta$ 42 and insoluble A $\beta$ 40 or A $\beta$ 42 in 3-month-old mouse brains were analyzed by ELISA. (B) Exo-cell  $\gamma$ -secretase activity assay for recombinant APP substrate in 5xFAD or *Psen1*<sup>KI/KI</sup> mouse.  $\gamma$ -Secretase activity is expressed as arbitrary units (for details see Methods). (C) Quantification of microglial density in 5xFAD and 5xFAD\* *Psen1*<sup>KI/KI</sup> mice (cells /  $10^{-3}$   $\text{mm}^3$ ). (D) Confocal stack of astrocytes (GFAP yellow) or (E) microglia (Iba1 cyan, A $\beta$  plaque magenta, DNA yellow) in the 3-month-old mice brains. Scale bar represents 10  $\mu\text{m}$ . Quantification of GFAP<sup>+</sup> cells (D right panel) or Iba-1 intensity (E right panel) in 5xFAD and

5xFAD\* *Psen1*<sup>KI/KI</sup> mice using fluorescence intensity values. Data represent means ± SEM ( $n = 5$  mice per group; \*\* $P < 0.01$  \*\*\* $P < 0.001$ , Student's t-test).

**Supplementary Figure 3: Quantification of synaptophysin and PSD95 in WT, *Psen1*<sup>KI/KI</sup>, 5xFAD and 5xFAD\* *Psen1*<sup>KI/KI</sup> mice.**

(A) Quantification of synaptophysin and PSD95 in the hippocampal hilus and molecular layer related to Figure 5 (details described in methods). Mice were 3 months old. Data are represented as mean ± SEM.  $N = 8-12$  microglia per group, 3 mice per group. \* $P < 0.05$ , \*\* $P < 0.01$ , \*\*\* $P < 0.001$ , one-way ANOVA followed by Duncan's Method.

**Supplemental Table S1 content:**

- Gene expression of adult microglia, Related to Figure 2.
- Quantification of A $\beta$  plaques using ClearMap, Related to Figure 4.

**Supplemental movie legends**

**Supplemental movie 1: WT versus *Psen1*<sup>KI/KI</sup> microglia activation upon injury using a highly localized laser-induced micro lesion, Related to Figure 1 A-B.**

After the micro lesion *Psen1*<sup>KI/KI</sup> microglial cells displayed a slower kinetic response compared to WT. For details see Methods section: Multiphoton microscopy.

**Supplemental movie 2: Three-dimensional reconstruction used for the analysis of microglial morphology, Related to Figure 1 C-E.**

For details see Methods section: Morphology tracing and volume images

**Supplemental movie 3: Confocal imaging of amyloid- $\beta$  plaques using iDISCO, Related to Figure 4 D.**

Whole hemisphere labeled for amyloid- $\beta$  plaques (Congo red) with Confocal Microscopy using iDISCO. For details see Methods section: iDISCO visualization and ClearMap quantitation of plaques.

**Supplemental movie 4: Three-dimensional reconstruction used for the analysis of synapses (synaptophysin – green and PSD95- red), Related to Figure 5 C-F.**
